# Supplementary material for: Facile construction of an Ag0-doped Ag(i)-based coordination polymer via a self-photoreduction strategy for enhanced visible light driven photocatalysis
Source: Royal Society of Chemistry journal article supplement (doi:10.1039/d1ce00699a), 2021-01-01
Supplement: d1ce00699a1.pdf [file d1ce00699a1.pdf]

## Electronic Supporting Information

# **Facile construction of an Ag<sup>0</sup>-doped Ag(I)-based coordination polymer *via* self-photo-reduction strategy for enhanced visible light driven photocatalysis**

Wei Jiang<sup>a,b</sup>, Mengying Lv<sup>a</sup>, Baihui Gao<sup>a</sup>, Bo Liu<sup>a,c,\*</sup>, Guosong Yan<sup>a,c</sup>, Shi Zhou<sup>a,c,\*</sup>, Chunbo Liu<sup>a,b</sup>,  
Wei Xie<sup>a,c</sup>, Guangbo Che<sup>a,c</sup>

<sup>a</sup>Key Laboratory of Preparation and Application of Environmental Friendly Materials (Jilin Normal University), Ministry of Education, Changchun 130103, P. R. China.

<sup>b</sup>College of Environmental Science and Engineering, Jilin Normal University, Siping, 136000, P. R. China.

<sup>c</sup>Key Laboratory of Functional Materials Physics and Chemistry of the Ministry of Education, Jilin Normal University, Changchun 130103, China

\* Correspondence authors

E-mail: liubo1999@jlnu.edu.cn (Bo Liu)

E-mail: zhoushi@jlnu.edu.cn (Shi Zhou)

Fax :+86-434-3290623

## **Experimental**

### **Materials and characterization**

All the chemical reagents were obtained commercially and used without further purification. The infrared (IR) spectrum was collected on a Nicolet iS50 FT-IR spectrometer (ThermoFisher, United States). Elemental analysis (C, H, N) was performed on a VarioEL III Elemental Analyzer (Elementar, Germany). The crystalline structures of the materials were analyzed by PXRD (Rigaku, Dmax 2000) with CuK $\alpha$  radiation ( $\lambda = 1.5406 \text{ \AA}$ ) at room temperature in the range of 5°-80°. The morphology and size of samples were observed by SEM (Hitachi, Regulus 8100) a. The XPS characterizations were obtained on an ESCALAB250XI electron spectrometer (VG Scientific,

America). The UV-vis diffuse reflectance spectra (DRS) were collected by a UV-vis spectrophotometer (UV-2550, Shimidazu). Photocurrents and EIS were recorded using a PGSTAT-302N electrochemical workstation. The photoluminescence (PL) spectra were measured using a F4500 (Hitachi, Japan) photoluminescence detector with an excitation wavelength of 300 nm. ESR analyses were performed on the Bruker EPR JES-FA200 spectrometer.

#### Photoelectrochemical measurements

Photoelectrochemical performances of the prepared photo-anodes were recorded on an electrochemical work station (CHI760E) with a standard three electrode system. 0.5 M Na<sub>2</sub>SO<sub>4</sub> solution was used as the electrolyte. A 300W Xe lamp (Beijing PerfectLight) was used as a light source. Transient photocurrent measurements at a constant bias (0.8 V) with chopped illumination were also conducted to examine the steady-state photocurrent densities of the photoanodes. Electrochemical impedance spectra (EIS) were carried out in the frequency range of 1-10<sup>5</sup> Hz. The Mott-Schottky measurement was performed at the frequency of 1000 Hz.

#### X-ray crystallography

Crystal data was collected Bruker Smart Apex II CCD diffractometer with graphite monochromatic MoK $\alpha$  radiation ( $\lambda = 0.71073$  Å) at room temperature. The structures were solved by direct methods of *SHELXS-2014* and refined on  $F^2$  by full-matrix least-squares using the *SHELXL-2014* within *WINGX* [1,2]. All the calculations were performed under *WINGX* program. All non-hydrogen atoms were refined anisotropically, and the hydrogen atoms of organic ligands and water molecules were generated geometrically. The crystallographic data for **JLNU-90** is listed in Table S1, selected bond lengths and bond angles are summarized in Table S2.

**Table S1** Selected crystallographic data for **JLNU-90**

| Compound          | JLNU-90                                                                         |
|-------------------|---------------------------------------------------------------------------------|
| Empirical formula | C <sub>32</sub> H <sub>30</sub> N <sub>7</sub> O <sub>8.5</sub> Ag <sub>2</sub> |
| Formula weight    | 864.37                                                                          |
| Crystal system    | Triclinic                                                                       |
| Space group       | <i>P</i> -1                                                                     |
| <i>a</i> (Å)      | 11.388(3)                                                                       |

|                                                |                                                       |
|------------------------------------------------|-------------------------------------------------------|
| <b><i>b</i> (Å)</b>                            | 12.621(3)                                             |
| <b><i>c</i> (Å)</b>                            | 14.493(4)                                             |
| <b><i>α</i> (°)</b>                            | 100.520(5)                                            |
| <b><i>β</i> (°)</b>                            | 109.121(5)                                            |
| <b><i>γ</i> (°)</b>                            | 97.132(5)                                             |
| <b><i>V</i> (Å<sup>3</sup>)</b>                | 1896.8(8)                                             |
| <b><i>Z</i></b>                                | 2                                                     |
| <b>Goodness-of-fit on <i>F</i><sup>2</sup></b> | 0.589                                                 |
| <b>Reflns collected/unique</b>                 | 13005                                                 |
| <b><i>θ</i> Range (°)</b>                      | 3.06-51.3                                             |
| <b><b>R</b> (<i>I</i> &gt; 2σ(<i>I</i>))</b>   | R <sub>1</sub> = 0.0531 ,<br>wR <sub>2</sub> = 0.1597 |
| <b><b>R</b> (all data)</b>                     | R <sub>1</sub> = 0.1075 ,<br>wR <sub>2</sub> = 0.2046 |
| <b>CCDC</b>                                    | 2079891                                               |

**Table S2** Selected bond distances (Å) and angles (°) for **JLNU-90**.

|                                |            |                                |            |
|--------------------------------|------------|--------------------------------|------------|
| Ag(1)-N(2) <sup>#1</sup>       | 2.140(5)   | Ag(2)-N(3) <sup>#1</sup>       | 2.170(4)   |
| Ag(1)-N(1)                     | 2.159(4)   | Ag(2)-N(4)                     | 2.180(4)   |
| Ag(1)-O(3)                     | 2.262(4)   | Ag(2)-O(4)                     | 2.591(4)   |
| N(2) <sup>#1</sup> -Ag(1)-N(1) | 174.92(16) | N(3) <sup>#1</sup> -Ag(2)-N(4) | 168.83(15) |
| N(2) <sup>#1</sup> -Ag(1)-O(3) | 91.39      | N(3)-Ag(2)-O(4)                | 95.30(18)  |
| N(1)-Ag(1)-O(3)                | 93.66      | N(4)-Ag(2)-O(4)                | 91.07(17)  |

Symmetry code: <sup>#1</sup> 1+x, y, z.

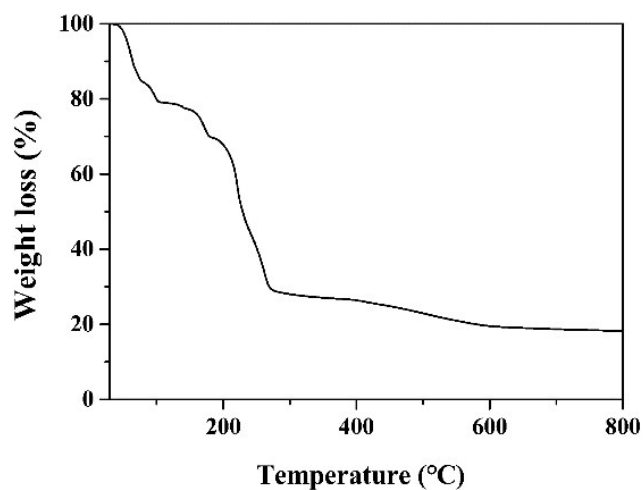

**Fig. S1.** TG curve of the as-synthesized JLNU-90.

The guest molecules in JLNU-90 were evaluated through TG analysis (Fig. S1). The lost weight of before 100 °C corresponds to the release of two acetonitrile and two and a half water molecules (obsd 18.15 %, calcd 17.23 %). The second weight loss occurs from 180 °C should be attributed to the decomposition of organic ligands.

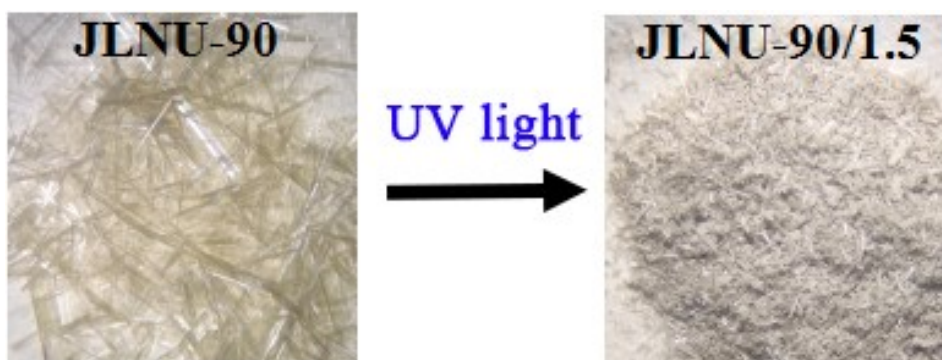

**Fig. S2.** The optical photographs of JLNU-90 and JLNU-90/1.5.

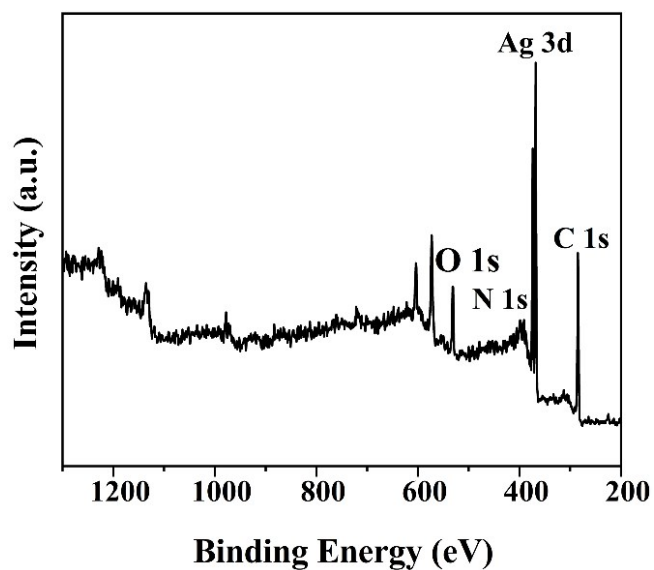

**Fig. S3.** The XPS survey spectrum of JLNU-90/1.5.

**Table S3.** Comparison of Ag(I)-based coordination polymers

| Catalysts                                                                                                                                                         | Light source       | MB concentration (mg/L) | Dosage of catalysts | Time (min) | Degradation efficiency (%) | k value (min <sup>-1</sup> ) | Ref.      |
|-------------------------------------------------------------------------------------------------------------------------------------------------------------------|--------------------|-------------------------|---------------------|------------|----------------------------|------------------------------|-----------|
| <b>JLNU-90/1.5</b>                                                                                                                                                | 10 W               |                         |                     |            |                            |                              |           |
|                                                                                                                                                                   | LED (vis)          | 10                      | 20 mg               | 120        | 70                         | 0.00896                      | This work |
| [Ag(HIPA)(L)] <sub>n</sub>                                                                                                                                        | 500 W Hg lamp (UV) | 10                      | 0.01 mmol           | 150        | 95.9                       | 0.0177                       | 3         |
| [Ag(L)(HNTP)] <sub>n</sub>                                                                                                                                        | 500 W Hg lamp (UV) | 10                      | 0.01 mmol           | 240        | 93.5                       | 0.0106                       | 4         |
| [Ag <sub>2</sub> (dmt) <sub>2</sub> (tph)] <sub>n</sub>                                                                                                           | 300 W Hg lamp (UV) | 3.2                     | 100 mg              | 130        | 96                         | 0.015                        | 5         |
| [Ag <sub>2</sub> (dmt) <sub>2</sub> (oxalate)] <sub>n</sub>                                                                                                       | 300 W Hg lamp (UV) | 3.2                     | 100 mg              | 130        | ~80                        | 0.011                        | 5         |
| [Ag <sub>2</sub> (dmt) <sub>4</sub> (SO <sub>4</sub> ) <sub>2</sub> ·2(dmt)·2(H <sub>2</sub> O)]                                                                  | 300 W Hg lamp (UV) | 3.2                     | 100 mg              | 130        | ~68                        | 0.007                        | 5         |
| [Ag <sub>4</sub> (L <sup>1</sup> ) <sub>2</sub> (HSiW <sup>V</sup> <sub>11</sub> V <sup>VO</sup> <sub>40</sub> )]·~25H <sub>2</sub> O                             | UV                 | 6.4                     | 150 mg              | 120        | 93                         | -                            | 6         |
| [Ag <sub>4</sub> (L <sup>2</sup> ) <sub>2</sub> (H <sub>2</sub> O) <sub>2</sub> (PW <sup>V</sup> <sub>11</sub> V <sup>VO</sup> <sub>40</sub> )]·2H <sub>2</sub> O | UV                 | 6.4                     | 150 mg              | 120        | 87.3                       | -                            | 6         |

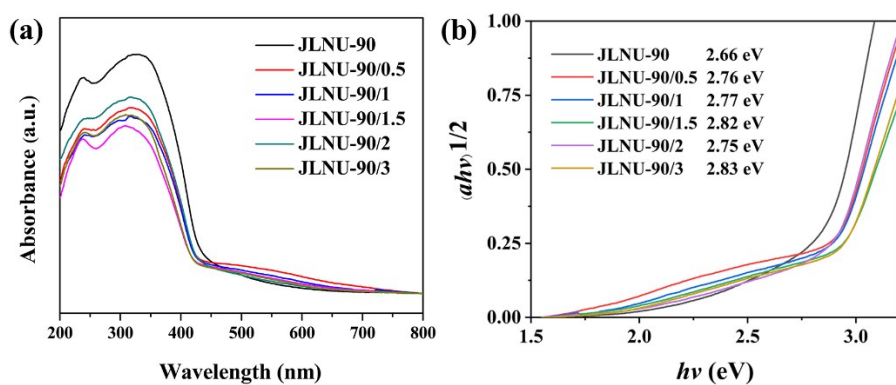**Fig. S4.** (a) UV-vis DRS and (b) direct energy band gap of JLNU-90 and JLNU-90/x.

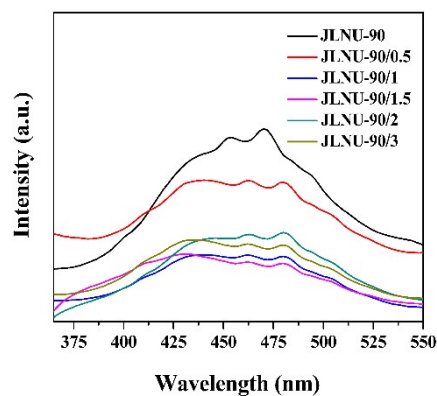

Fig. S5. PL spectra of JLNU-90 and JLNU-90/x.

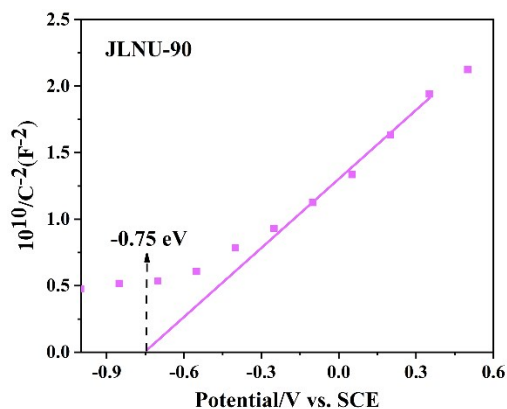

Fig. S6. The Mott-Schott curve of JLNU-90.

## Reference

- 1 G. M. Sheldrick *SHELXS-2014, Program for the Solution of Crystal Structures* (University of Göttingen, Germany, 2014).
- 2 G. M. Sheldrick *SHELXL-2014, Program for the Refinement of Crystal Structure* (University of Göttingen, Germany, 2014).
- 3 A. Li, Z. Hao, C. Han and G. Cui, *Appl. Organomet. Chem.*, 2019, 34, e5313.
- 4 H. Zhu, D. Liu, Y.-H. Li and G.-H. Cui, *Inorg. Chem. Commun.*, 2019, **108**, 107539.
- 5 S. Kulovi, S. Dalbera, S. Das, E. Zangrando, H. Puschmann and S. Dalai, *ChemistrySelect*, 2017, **2**, 9029–9036.
- 6 X.-L. Wang, J.-J. Cao, G.-C. Liu, A.-X. Tian, J. Luan, H.-Y. Lin, J.-W. Zhang and N. Li, *CrystEngComm*, 2014, **16**, 5732–5740.
